# Supplementary material for: α1-Acid Glycoprotein Enhances the Immunosuppressive and Protumor Functions of Tumor-Associated Macrophages
Source: Oxford University Press journal article supplement (doi:10.1158/0008-5472.can-20-3471), 2021-07-01
Supplement: 00085472can203471-sup-253613_3_supp_7201515_qv107n.docx [file 00085472can203471-sup-253613_3_supp_7201515_qv107n.docx]

**Supplementary Fig. S7**.


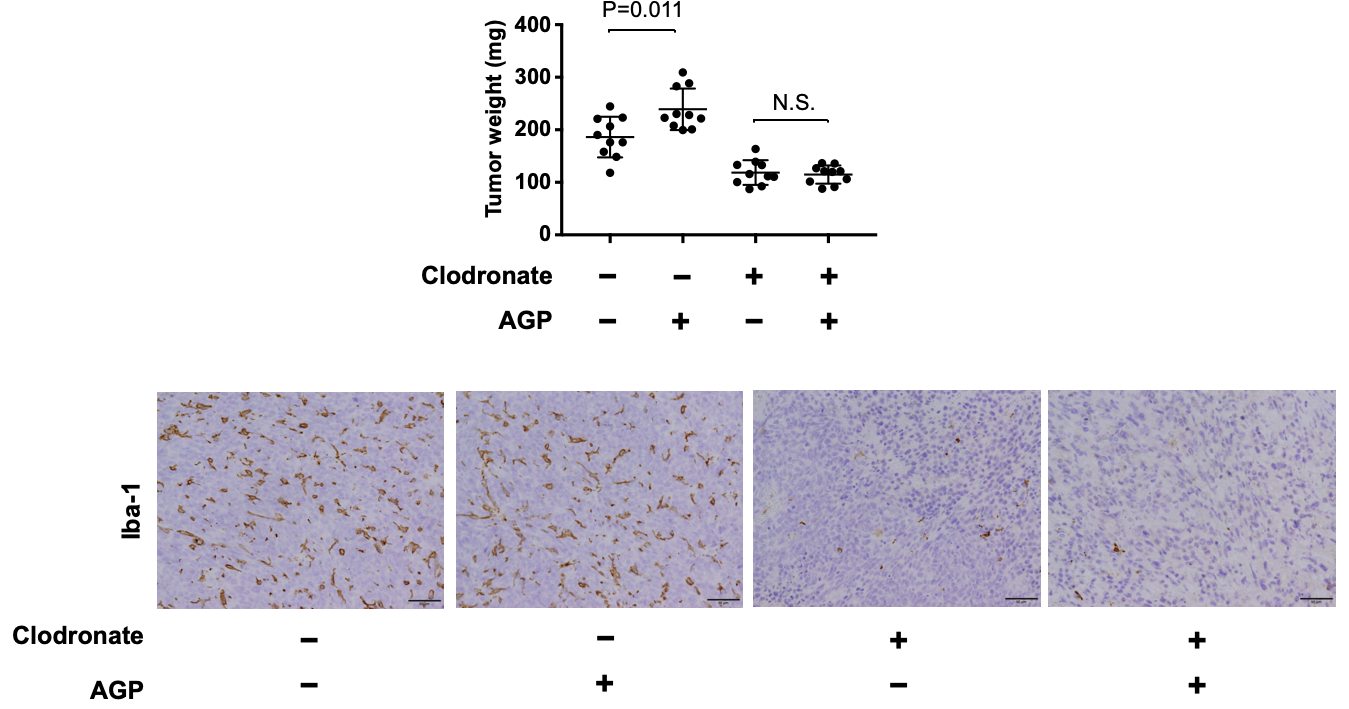


**Supplementary Figure S7**. ***Effect of macrophage depletion on tumor development in AGP-treated tumor-bearing mouse model.*** AGP (2 mg/mouse) was administered to LM8 bearing C3H HeN mice treated with clodronate liposome to deplete macrophages, followed by the determination of subcutaneous tumor weights **(A) (**n=10 mice per group**)**. Iba-1-positive cells in LM8 subcutaneous tumor tissues were evaluated by immunostaining **(B)**. Statistical differences between groups were calculated by non-repeated-measures ANOVA.
