# Supplementary material for: α1-Acid Glycoprotein Enhances the Immunosuppressive and Protumor Functions of Tumor-Associated Macrophages
Source: Oxford University Press journal article supplement (doi:10.1158/0008-5472.can-20-3471), 2021-07-01
Supplement: 00085472can203471-sup-253613_3_supp_7201522_qv107p.docx [file 00085472can203471-sup-253613_3_supp_7201522_qv107p.docx]

**Supplementary Table 1.** The list of antibodies for western blot analysis and primers for RT-qPCR

| **Primer Name** | **Forward Primer Sequence (5'-3')** | **Reverse Primer Sequence (5'-3')** |
| --- | --- | --- |
| Human IL-6 | ATGTGTGAAAGCAGCAAAGAGG | GTGATGATTTTCACCAGGCAAG |
| Human GROα | TCACCCCAAGAACATCCAAAG | GGATGCAGGATTGAGGCAAG |
| Human CXCL8 | CAAACTTTCAGAGACAGCAGAGC | GGCCAGCTTGGAAGTCATGTTTA |
| Human β-actin | ATTCCTATGTGGGCGACGAG | AAGGTGTGGTGCCAGATTTTC |
| Mouse IFN-γ | GCTTTGCAGCTCTTCCTCAT | GTCACCATCGTTTTGCCAGT |
| Mouse β-actin | TTTCCAGCCTTCCTTCTTGG | TGGCATAGAGGTCTTTACGGATG |
