# Supplementary material for: α1-Acid Glycoprotein Enhances the Immunosuppressive and Protumor Functions of Tumor-Associated Macrophages
Source: Oxford University Press journal article supplement (doi:10.1158/0008-5472.can-20-3471), 2021-07-01
Supplement: 00085472can203471-sup-253613_3_supp_7201525_qv107p.docx [file 00085472can203471-sup-253613_3_supp_7201525_qv107p.docx]

**Supplementary Fig. S3**.


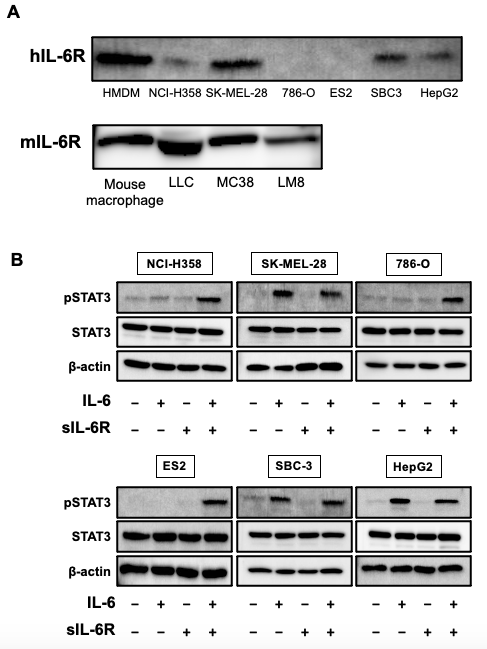


**Supplementary Figure S3**. ***Involvement of IL-6R in AGP-MCM-induced STAT3 activation in tumor cells.*** IL-6R expression in macrophages and several tumor cells were determined by western blot analysis **(A)**. HMDMs were incubated with IL-6 (10 ng/mL) and soluble IL-6R (20 ng/ml) for 24 h, followed by the determination of p-STAT3, STAT3, and β-actin expression by western blot analysis **(B)**.
