# Supplementary material for: α1-Acid Glycoprotein Enhances the Immunosuppressive and Protumor Functions of Tumor-Associated Macrophages
Source: Oxford University Press journal article supplement (doi:10.1158/0008-5472.can-20-3471), 2021-07-01
Supplement: 00085472can203471-sup-253613_3_supp_7201526_qv107p.docx [file 00085472can203471-sup-253613_3_supp_7201526_qv107p.docx]

**Supplementary Fig. S4**.


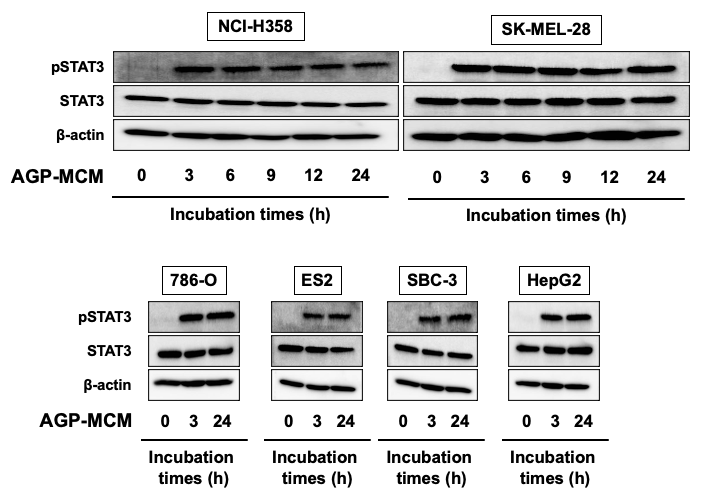


**Supplementary Figure S4**. ***Effects of AGP-treated macrophage-conditioned medium on STAT3 activation in tumor cells.*** Several tumor cells were incubated with AGP-MCM for the indicated times, followed by the determination of p-STAT3, STAT3, and β-actin expression by western blot analysis.
