# Supplementary material for: α1-Acid Glycoprotein Enhances the Immunosuppressive and Protumor Functions of Tumor-Associated Macrophages
Source: Oxford University Press journal article supplement (doi:10.1158/0008-5472.can-20-3471), 2021-07-01
Supplement: 00085472can203471-sup-253613_3_supp_7201527_qv107p.docx [file 00085472can203471-sup-253613_3_supp_7201527_qv107p.docx]

**Supplementary Fig. S5**.


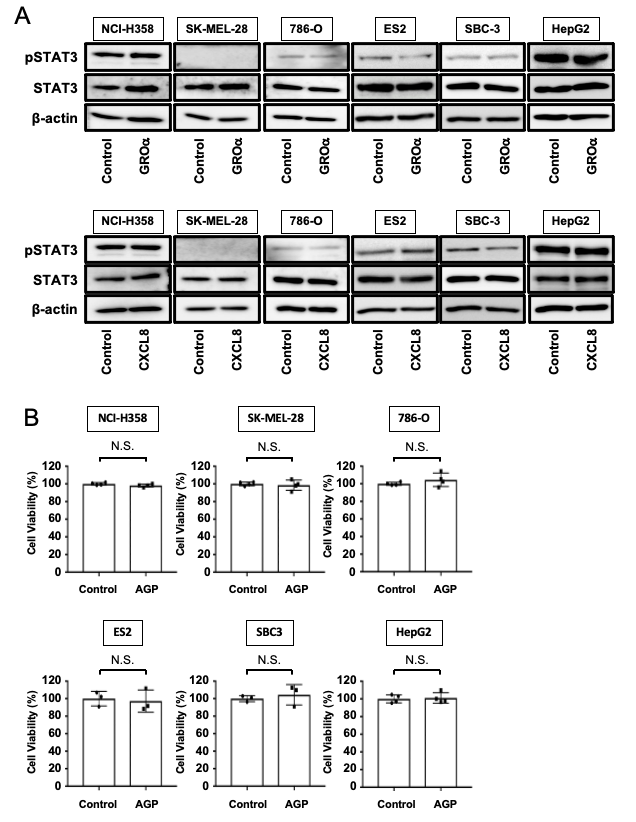


**Supplementary Figure S5**. ***Effects of GROα and CXCL8 on STAT3 activation in tumor cells, and the effect of AGP on tumor proliferation in tumor cells.*** Several tumor cells were incubated with GROα (1 ng/mL) or CXCL8 (1 ng/mL) for 24 h, followed by the determination of p-STAT3, STAT3, and β-actin expression by western blot analysis (**A**).Several human tumor cells were incubated with AGP (1 mg/mL) **(**NCI-H358, n=4 per group; SK-MEL-28, n=4 per group; 786-O, n=4 per group; ES2, n=3 per group; SBC3, n=3 per group; and HepG2, n=4 per group**)** for 24 h, followed by the determination of tumor proliferation by Cell Counting Kit-8 **(B)**. The experiments were repeated three times with nearly identical results.
